# Supplementary material for: Untargeted lipidomics study of coronary artery disease by FUPLC-Q-TOF-MS
Source: Royal Society of Chemistry journal article supplement (doi:10.1039/c5ay02258d), 2016-01-01
Supplement: c5ay02258d1.pdf [file c5ay02258d1.pdf]

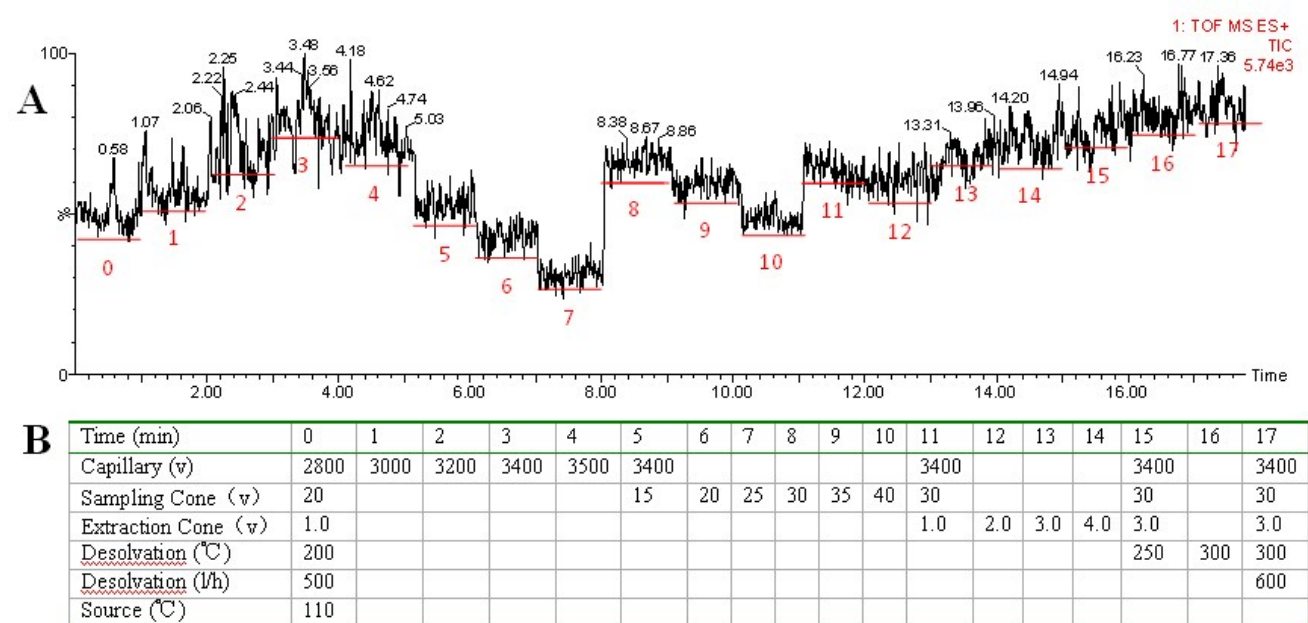

**Fig S1.** Chromatogram (A) and MS (B) optimization in positive ion mode.

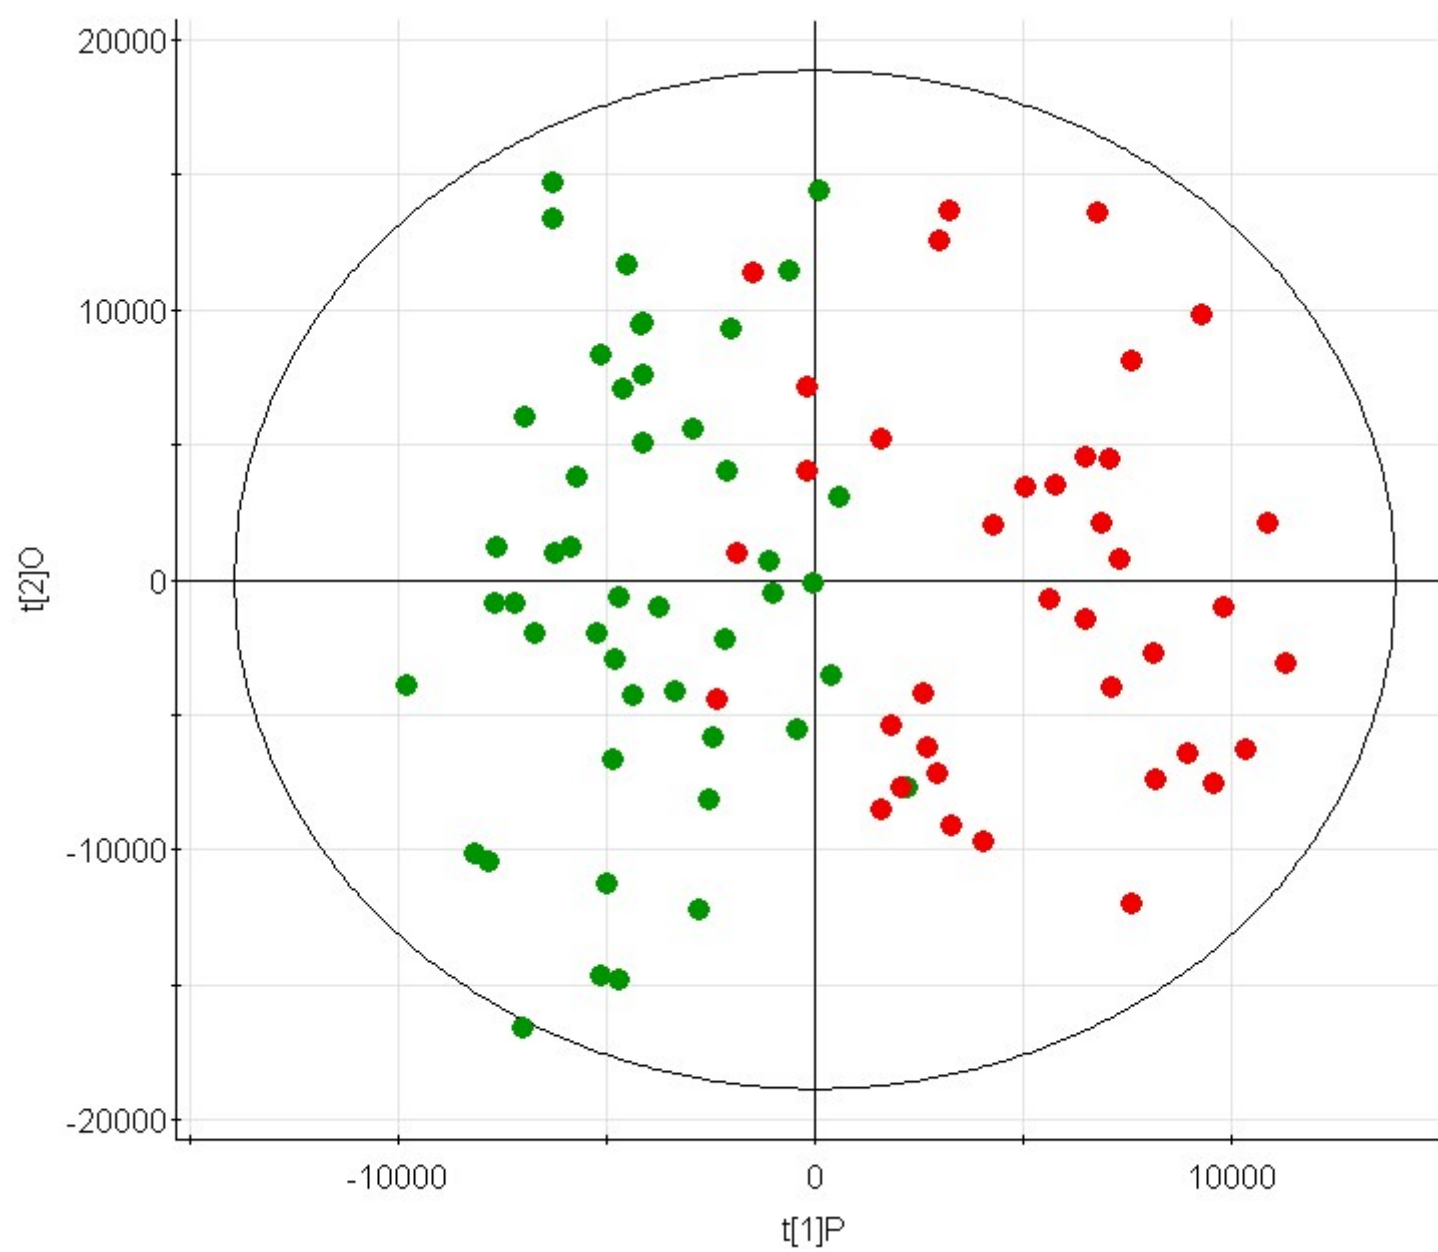

**Fig.S2.** Score plots of lipidomic profiles obtained for controls (red) and CHD (green) using ultra high-performance liquid chromatography coupled with quadrupole time-of-flight mass spectrometry at negative ESI mode.

**Table S1.** Biochemistry results in CHD group.

| Group   | SOD(U/ml)   | MDA(nmol/ml) | cAMP(pmol/ml) | cGMP(pmol/ml) | ANF(ng/ml) | cTn-I (ng/ml) |
|---------|-------------|--------------|---------------|---------------|------------|---------------|
| Control | 1.46±0.12   | 4.44±0.70    | 14.24±2.47    | 13.04±2.45    | 0.41±0.07  | 6.20±0.67     |
| CHD     | 1.18±0.07** | 5.85±0.69**  | 20.25±6.07*   | 16.93±4.02*   | 0.42±0.07  | 6.69±0.41     |

\*Significant difference from control group at  $p < 0.05$

**Table S2.** Identification of serum lipid in CHD cases.

| No | Retention time (min) | m/z    | Compound ID  | Adducts | Formula                                           | Mass Error (ppm) | VIP   | Compound                           | Anova (p) | Trend |
|----|----------------------|--------|--------------|---------|---------------------------------------------------|------------------|-------|------------------------------------|-----------|-------|
| 1  | 3.27                 | 452.28 | LMGP02050010 | M+H     | C <sub>21</sub> H <sub>42</sub> NO <sub>7</sub> P | 1.99             | 16.43 | PE(16:1(9Z)/0:0)                   | 0.0079    | Up    |
| 2  | 0.44                 | 361.20 | LMST02030026 | M+H     | C <sub>21</sub> H <sub>28</sub> O <sub>5</sub>    | 1.48             | 16.39 | Aldosterone                        | 0.0034    | Up    |
| 3  | 7.56                 | 285.10 | LMGP0105AA00 | M+H     | C <sub>9</sub> H <sub>19</sub> NO <sub>7</sub> P  | 3.37             | 15.11 | 2-acyl-sn-glycero-3-phosphocholine | 0.0024    | Up    |
| 4  | 4.47                 | 297.17 | LMPR02020062 | M+H     | C <sub>16</sub> H <sub>24</sub> O <sub>5</sub>    | -4.72            | 14.7  | alpha-tocopheronic acid            | 0.0028    | Up    |

**Table S3.** Result from ingenuity pathway analysis with MetPA.

| Pathway                        | Total | Expected  | Hits       | Raw p    | Holm adjust | Impact |
|--------------------------------|-------|-----------|------------|----------|-------------|--------|
| Glycerophospholipid metabolism | 39    | 0.0486082 | 0.00075984 | 0.060787 | 0.10746     |        |
| Glycerolipid metabolism        | 32    | 0.0398841 | 0.039372   | 1        | 0.01247     |        |
| Steroid hormone biosynthesis   | 99    | 0.123391  | 0.11843    | 1        | 0.01235     |        |

Note: Total is the total number of compounds in the pathway; the Hits is the actually matched number from the user uploaded data; the Impact is the pathway impact value calculated from pathway topology analysis.
